# Supplementary material for: Cold Shock Domain Protein DbpA Orchestrates Tubular Cell Damage and Interstitial Fibrosis in Inflammatory Kidney Disease
Source: MDPI journal article supplement (doi:10.3390/cells12101426), 2023-05-19
Supplement: s1 [file s1]

**Gating strategy**

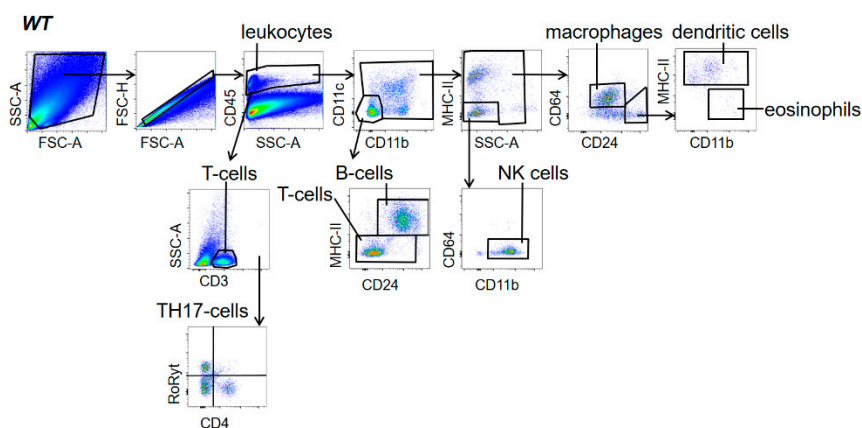

**Supplementary Figure S1.** Gating strategy for flow cytometric analysis of infiltrating immune cells.

**A**

CSDA\_CRA\_a [ mouse ]  
CSDA\_CRA\_a [rat, EDM01693.1 ]

```
MESPREHSSRLIGIRLTARGSAGDLLAHDLP LLLERLTKKTSKRLMVQTSRLPAVDSDV
::: :: :: :: :: :: :: :: :: :: :: :: :: :: :: :: :: :: :: :: :: :: :: :: ::
MESPRERSSRFIGIPLTAQGSAGDLLAHDLP LLLERLKIKKISKRP MVQTSRLPAVDSDA
```

```
PTTIGAVPVPSTLFHKMAKRPRQVKHQLRTPLQLPNRAVP SDPGSQAP _mouse
:: :: :: :: :: :: :: :: :: :: :: :: :: :: :: :: :: :: :: :: :: :: :: ::
PTTTGAAPVPSTLFHKMAKRPRQVKHQLRTPLQPPNRAVP SDPGSQAPSPAG _rat
```

**B**

KO\_b [ mouse ]

```
MSEAGEATTGGTTLPQAAADAPAAAPPDPAPKSPAASGAPQAPAPAALLAGSPGGDAAPG
PAPASSAPAGGEDAEKKVLGDLLAHDLP LLLERLTKKTSKRLMVQTSRLPAVDSDVPTT
IGAVPVPSTLFHKMAKRPRQVKHQLRTPLQLPNRAVP SDPGSQAP
```

**Supplementary Figure S2.** (A) The sequence homology between the translated protein sequences for mouse and rat CRA\_a is depicted. Colons indicate conserved amino acids. (B) The amino acid sequence of the translated KO\_b fusion protein is presented.

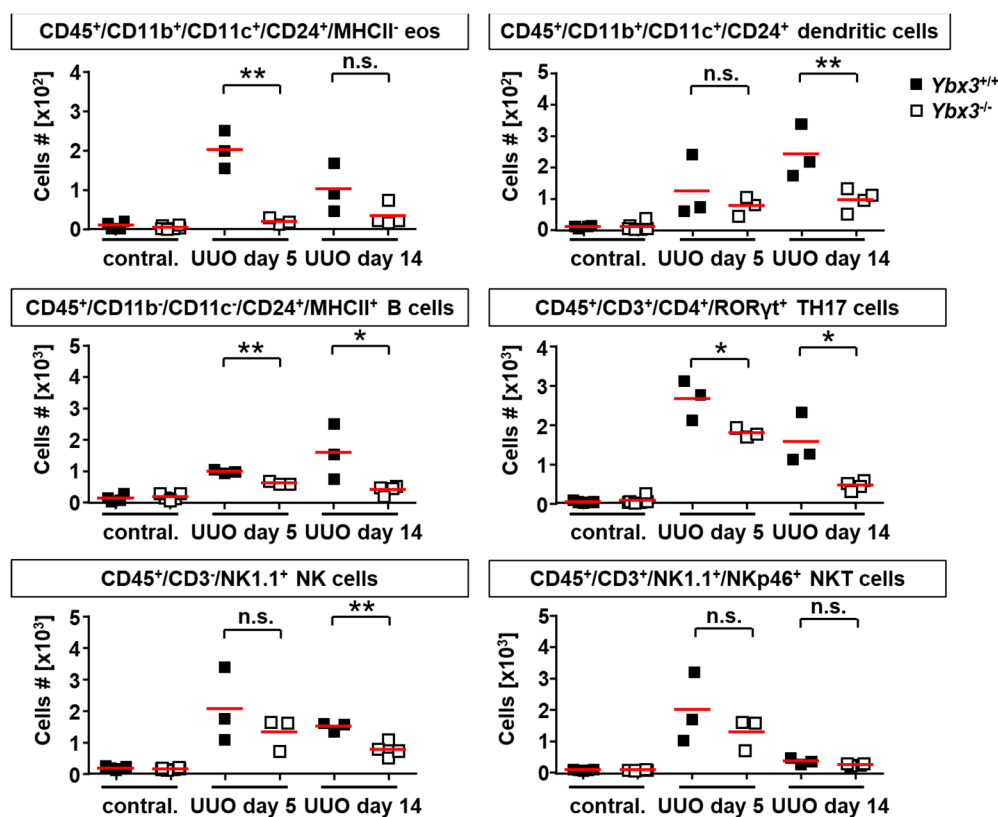

**Supplementary Figure S3.** Flow cytometry analyses of infiltrating immune cells at day 5 and 14 is presented for eosinophils (CD11b<sup>+</sup>/CD11c<sup>+</sup>/CD24<sup>+</sup>/MHCII<sup>-</sup>), dendritic cells (CD11b<sup>+</sup>/CD11c<sup>+</sup>/CD24<sup>+</sup>), B-cells (CD11b<sup>+</sup>/CD11c<sup>+</sup>/CD24<sup>+</sup>/MHCII<sup>+</sup>), TH17-cells (RORγt<sup>+</sup>/CD4<sup>+</sup>), NK cells (CD3<sup>+</sup>/NK1.1<sup>+</sup>), and NKT cells (CD3<sup>+</sup>/NK1.1<sup>+</sup>/NKP46<sup>+</sup>) from wild type and knockout animals.

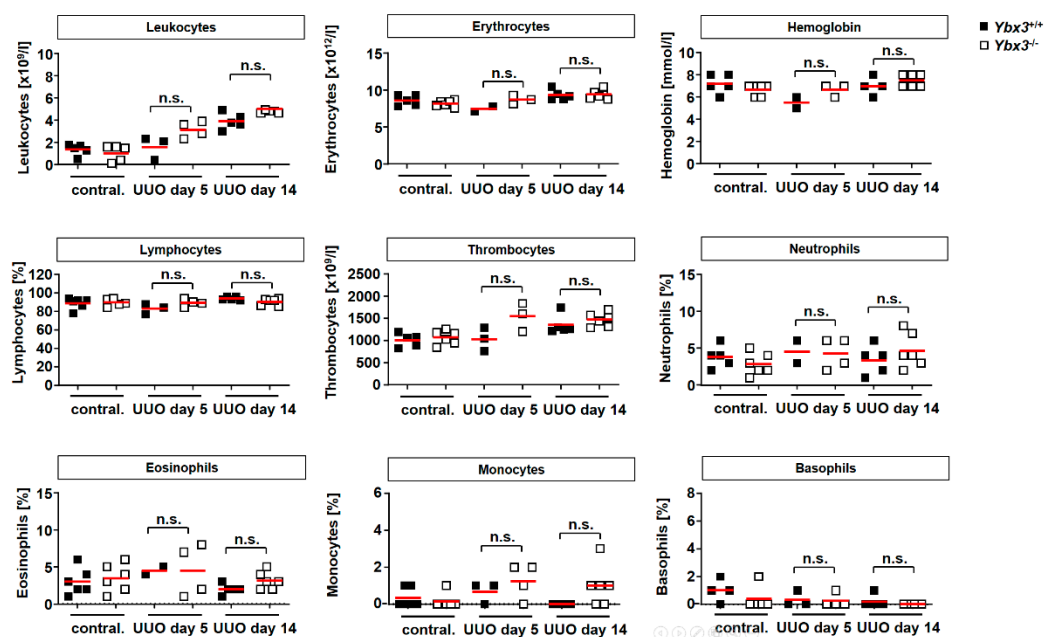

**Supplementary Figure S4.** Blood composition of wild type and knockout mice was analyzed after 5 and 14 days of UUO. Mean values are indicated by the red line. No significant differences in blood values were observed.
